# Supplementary material for: Rapid protein profiling facilitates surveillance of invasive mosquito species
Source: PubMed Central journal article supplement (PMC4022357; doi:10.1186/1756-3305-7-142), 2014-03-31
Supplement: 1756-3305-7-142-S1.pdf [file 1756-3305-7-142-S1.pdf]

## Additional file 1 - Origin and suppliers of aedine egg samples.

| Species                 | Strain/field samples <sup>1</sup> | Origin              | Provided by                              |
|-------------------------|-----------------------------------|---------------------|------------------------------------------|
| <i>Ae. aegypti</i>      | UGAL strain                       | Georgia, USA        | Prof. M.R. Brown, UGA, USA               |
|                         | Manatee County (1)                | Florida, USA        | Prof. D. Fonseca, CVB-Rutgers, USA       |
|                         | Rock (2)*                         | Cuba                | Dr. P. Müller, Swiss TPH, Switzerland    |
|                         | Field sample (2)                  | New Caledonia       | Dr. L. Guillaumot, IPNC, New Caledonia   |
| <i>Ae. albopictus</i>   | Liguria 2011 (1)*                 | Liguria, Italy      | Dr. C. Kaufmann, IPZ, Switzerland        |
|                         | Monmouth County (2)               | New Jersey, USA     | Prof. D. Fonseca, CVB-Rutgers, USA       |
|                         | St. Johns County (1)              | Florida, USA        | Prof. D. Fonseca, CVB-Rutgers, USA       |
|                         | ATM-HI10 (1)                      | Hawaii, USA         | Prof. D. Fonseca, CVB-Rutgers, USA       |
|                         | MRA-804 (CDC)                     | Florida, USA        | Prof. M.R. Brown, UGA, USA               |
|                         | Field samples                     | Albania             | Dr. E. Dikolli, IPH, Albania             |
| <i>Ae. atropalpus</i>   | Bass Rock strain (2)              | Arizona, USA        | Prof. M.R. Brown, UGA, USA               |
|                         | RPM-NJ95 (3)                      | New Jersey, USA     | Prof. D. Fonseca, CVB-Rutgers, USA       |
|                         | Tallahassee 2007                  | Georgia, USA        | Prof. G. O'Meara, FMEL, Vero Beach, USA  |
| <i>Ae. cretinus</i>     | Lab strain Athens (5)             | Attica, Greece      | Dr. G. Koliopoulos, BPI, Greece          |
| <i>Ae. geniculatus</i>  | Field samples (2)                 | Alsace, France      | Dr. F. Schaffner, IPZ, Switzerland       |
|                         | Zurich 2012*                      | Zurich, Switzerland | Dr. C. Kaufmann, IPZ, Switzerland        |
|                         | Field samples                     | Vaud, Switzerland   | Dr. O. Glazot, UNIL, Switzerland         |
|                         | Field samples (3)                 | Namur, Belgium      | Prof. M. Coosemans, ITM, Belgium         |
| <i>Ae. j. japonicus</i> | Field samples (1)                 | Zurich, Switzerland | Dr. C. Kaufmann, IPZ, Switzerland        |
|                         | Field samples (1)                 | Uri, Switzerland    | C. Wüthrich, AFU, Switzerland            |
|                         | ARPM-PA07 (2)*                    | Pennsylvania, USA   | Prof. D. Fonseca, CVB-Rutgers, USA       |
|                         | ARPM-HI10 (1)                     | Hawaii, USA         | Prof. D. Fonseca, CVB-Rutgers, USA       |
| <i>Ae. koreicus</i>     | Field samples (5)                 | Limburg, Belgium    | Dr. F. Schaffner, IPZ, Switzerland       |
| <i>Ae. phoeniciae</i>   | Field samples (5)                 | Paphos, Cyprus      | Dr. F. Schaffner, IPZ, Switzerland       |
| <i>Ae. triseriatus</i>  | ETM-NJ95 (3)                      | New Jersey, USA     | Prof. D. Fonseca, CVB-Rutgers, USA       |
|                         | FMEL colony (2)                   | Florida, USA        | Prof. P. Lounibos, FMEL, Vero Beach, USA |

<sup>1</sup>In brackets: numbers of eggs used to develop the SuperSpectra™. \*Origin of eggs used in the experiments with pooled eggs.
