# Supplementary material for: Rapid protein profiling facilitates surveillance of invasive mosquito species
Source: PubMed Central journal article supplement (PMC4022357; doi:10.1186/1756-3305-7-142), 2014-03-31
Supplement: 1756-3305-7-142-S2.pdf [file 1756-3305-7-142-S2.pdf]

**Additional file 2 - Biomarker marker masses used for the identification of eggs of nine aedine mosquito species.**

Grey cells: conserved masses used for internal calibration (unit: m/z).

| <i>Aedes aegypti</i> | <i>Aedes albopictus</i> | <i>Aedes atropalpus</i> | <i>Aedes cretinus</i> | <i>Aedes geniculatus</i> | <i>Aedes japonicus</i> | <i>Aedes koreicus</i> | <i>Aedes phoeniciae</i> | <i>Aedes triseriatus</i> |
|----------------------|-------------------------|-------------------------|-----------------------|--------------------------|------------------------|-----------------------|-------------------------|--------------------------|
| 3'365.9              | 3'365.9                 | 5'201.9                 | 3'528.6               | 3'369.7                  | 5'341.8                | 3'807.7               | 3'159.9                 | 3'365.9                  |
| 3'923.7              | 3'678.7                 | 5'259.9                 | 3'586.2               | 4'796.3                  | 5'357.3                | 4'026.8               | 3'369.7                 | 3'906.4                  |
| 5'277.5              | 5'259.9                 | 5'341.8                 | 3'923.7               | 4'854.1                  | 5'382.3                | 5'357.3               | 3'586.2                 | 4'966.5                  |
| 5'542.4              | 5'417.9                 | 5'476.1                 | 4'010.1               | 5'047.0                  | 5'417.9                | 5'399.1               | 3'624.1                 | 5'009.9                  |
| 5'660.1              | 5'615.2                 | 5'660.1                 | 5'250.8               | 5'087.7                  | 5'526.6                | 5'453.7               | 3'638.2                 | 5'026.9                  |
| 5'743.8              | 5'660.1                 | 6'540.4                 | 5'277.5               | 5'259.9                  | 5'542.4                | 5'476.1               | 5'129.4                 | 5'067.5                  |
| 5'872.0              | 5'803.0                 | 6'555.4                 | 5'291.9               | 5'291.9                  | 5'603.4                | 5'506.7               | 5'660.1                 | 5'087.7                  |
| 6'438.2              | 6'226.6                 | 6'684.3                 | 5'439.8               | 5'341.8                  | 5'660.1                | 5'542.4               | 6'226.6                 | 5'183.4                  |
| 6'535.5              | 6'464.6                 | 6'796.7                 | 5'660.1               | 5'660.1                  | 5'702.6                | 5'660.1               | 6'392.8                 | 5'660.1                  |
| 6'638.9              | 6'535.5                 | 6'970.1                 | 6'403.8               | 6'555.4                  | 6'392.8                | 6'638.9               | 6'604.0                 | 5'916.7                  |
| 6'817.5              | 6'638.9                 | 7'537.6                 | 6'488.3               | 6'624.0                  | 6'624.0                | 6'817.5               | 6'868.4                 | 6'638.9                  |
| 6'928.3              | 6'817.5                 | 8'957.2                 | 6'535.5               | 6'836.4                  | 6'664.0                | 7'144.4               | 6'887.0                 | 7'202.6                  |
| 7'239.4              | 7'239.4                 | 9'001.7                 | 6'817.5               | 7'239.4                  | 6'817.5                | 7'447.8               | 6'944.6                 | 7'447.8                  |
| 8'625.5              | 8'761.3                 | 11'321.8                | 7'239.4               | 7'331.5                  | 8'668.5                | 8'925.1               | 7'113.8                 | 8'668.5                  |
| 8'925.1              | 9'618.0                 | 11'364.7                | 8'740.4               | 7'405.4                  | 9'190.7                | 9'554.5               | 7'170.6                 | 9'618.0                  |
| 9'001.7              | 11'321.8                | 12'483.8                | 8'761.3               | 8'443.6                  | 11'321.8               | 9'636.6               | 7'629.3                 | 9'679.0                  |
| 9'706.2              | 11'364.7                | 12'888.8                | 11'321.8              | 11'321.8                 | 11'364.7               | 11'321.8              | 7'645.0                 | 11'321.8                 |
| 11'321.8             | 13'277.2                | 13'298.1                | 13'277.2              | 13'277.2                 | 13'246.6               | 13'277.2              | 7'847.5                 | 13'277.2                 |
| 13'357.0             | 13'357.0                | 13'378.6                | 13'357.0              | 13'357.0                 | 13'327.0               | 13'357.0              | 8'088.4                 | 13'357.0                 |
| 13'634.7             | 13'634.7                | 13'594.7                | 13'634.7              | 13'674.4                 | 13'634.7               | 13'634.7              | 10'398.1                | 13'634.7                 |
